# Supplementary material for: Outcomes of Psychoeducation and a Text Messaging Adherence Intervention Among Individuals With Hypertension and Bipolar Disorder
Source: Atypon-hosted journal article supplement (doi:10.1176/appi.ps.201800482), 2019-04-17
Supplement: appi.ps.201800482.ds001.pdf [file appi.ps.201800482.ds001.pdf]

**Table 1:** Text Categories and Sample Stems for iTAB-CV Intervention

| <b>Text Category</b>                                 | <b>Sample Stems</b>                                                                |
|------------------------------------------------------|------------------------------------------------------------------------------------|
| Hypertension Knowledge                               | There are usually no symptoms for high blood pressure                              |
| Bipolar Disorder Knowledge                           | It is important to take *BD* meds even if my mood is stable                        |
| Benefits of Blood Pressure Medication                | Taking my *HTN* meds every day once my blood pressure is lower will keep it stable |
| Risks of <u>Not Taking</u> Blood Pressure Medication | If I don't take my *HTN* meds, I could have a heart attack                         |
| Benefits of BD Medication                            | *BD* meds make it less likely that I will become depressed                         |
| Risks of <u>Not Taking</u> BD Medication             | If I don't take my *BD* meds, I may become manic/hypomanic or very irritable       |
| Making Peace with Medication                         | The good aspects of meds outweigh the side effects                                 |
| Social Support                                       | People care about me and want me to take my meds                                   |
| Self-Efficacy                                        | If I take my meds every day, my mood and health will be more stable                |
| Medication Routines                                  | Keep meds somewhere I will see them                                                |
| Spiritual                                            | Trust in the Lord. I can take care of myself by taking my meds                     |
| Celebrate Health                                     | Taking meds regularly is important for my physical and mental health               |
| Self Esteem                                          | It's a great accomplishment to take care of my health by taking my meds!           |

**Table 2:** Demographic and clinical characteristics of the sample collected at screen (N=38)

| Variable                                           | Mean or N | SD or %    |
|----------------------------------------------------|-----------|------------|
| Age                                                | 51.53     | 9.06       |
| Female                                             | 20        | 52.6%      |
| <b>Marital Status</b>                              |           |            |
| Single/Never married                               | 20        | 52.6%      |
| Married                                            | 3         | 7.9%       |
| Separated/Divorced/Widowed                         | 15        | 39.5%      |
| <b>Race</b>                                        |           |            |
| African-American                                   | 28        | 73.7%      |
| Caucasian                                          | 9         | 23.7%      |
| Other                                              | 1         | 2.6%       |
| Hispanic                                           | 2         | 5.3%       |
| Years of education                                 | 13.18     | 2.69       |
| <b>Employment</b>                                  |           |            |
| Full time/homemaker                                | 1         | 2.6%       |
| Part time                                          | 3         | 7.9%       |
| Unemployed, but expected to work by self or others | 6         | 15.8%      |
| Disabled                                           | 28        | 73.7%      |
| <b>Insurance type</b>                              |           |            |
| Medicaid                                           | 28        | 73.7%      |
| Medicare                                           | 11        | 28.9%      |
| Private                                            | 0         | 0.0%       |
| No insurance                                       | 0         | 0.0%       |
| Other                                              | 6         | 15.8%      |
| <b>Bipolar disorder type</b>                       |           |            |
| BD I                                               | 28        | 73.7%      |
| BD II                                              | 10        | 26.3%      |
| Age of Hypertension (HTN) Diagnosis                | 36.95     | 15.66      |
| Age of Bipolar Disorder Diagnosis                  | 31.95     | 13.46      |
| <b>Lifetime HTN-related hospitalizations</b>       |           |            |
| Yes                                                | 19        | 50.0%      |
| If yes, how many?<br>Median, range                 | 3.16      | range 1-15 |
| <b>Lifetime psychiatric hospitalizations</b>       |           |            |
| Yes                                                | 26        | 73.7%      |
| If yes, how many?<br>Median, range                 | 3.00      | range 1-30 |
| Family mental illness                              | 30        | 78.9%      |
| <b>Smokes cigarettes</b>                           |           |            |
| Yes                                                | 23        | 60.5%      |
| If yes, how many cigs per day?<br>Median, range    | 6.00      | range 1-20 |
| Body Mass Index (BMI)                              | 22.15     | 9.40       |

**Table 3:** One-way repeated measures ANOVAs (N=38)

|                                       | Screen (SCR) Mean | SD or % | Baseline (BL) Mean | SD or % | V1 Mean | SD or % | V2 Mean | SD or % | Statistic                                            |
|---------------------------------------|-------------------|---------|--------------------|---------|---------|---------|---------|---------|------------------------------------------------------|
| Systolic blood pressure*              | 144.81            | 15.46   | 133.04             | 17.89   | 134.83  | 19.60   | 136.02  | 17.77   | $\chi^2(3) = 17.61, p < 0.001^d, W = 0.15$           |
| <b>SRHI</b>                           |                   |         |                    |         |         |         |         |         |                                                      |
| HTN                                   | 3.60              | 1.01    | 4.43               | 1.18    | 4.91    | 1.28    | 5.17    | 1.13    | $F(2.4, 88.1) = 33.12, p < 0.001^c, \eta_p^2 = 0.47$ |
| BD                                    | 4.08              | 1.24    | 4.50               | 1.36    | 4.93    | 1.45    | 4.98    | 1.41    | $F(2.1, 78.6) = 7.64, p < 0.001^d, \eta_p^2 = 0.25$  |
| BPRS                                  | 33.21             | 6.19    | 29.95              | 6.11    | 29.26   | 5.82    | 29.00   | 6.39    | $F(3, 111) = 7.35, p < 0.001^a, \eta_p^2 = 0.17$     |
| MADRS                                 | 20.13             | 7.89    | 17.29              | 9.12    | 15.32   | 8.14    | 14.95   | 9.28    | $F(3, 111) = 4.66, p = 0.004^b, \eta_p^2 = 0.11$     |
| YMRS                                  | 9.11              | 5.31    | 8.30               | 4.56    | 7.57    | 5.39    | 6.78    | 4.18    | $F(3, 108) = 2.02, p = 0.12$                         |
| <b>Past week TRQ*</b>                 |                   |         |                    |         |         |         |         |         |                                                      |
| HTN                                   | 42.86             | 23.15   | 21.30              | 19.57   | 22.24   | 21.66   | 21.24   | 17.95   | $\chi^2(3) = 34.55, p < 0.001^a, W = 0.30$           |
| BD (N= 37)                            | 43.95             | 27.27   | 21.62              | 26.22   | 21.94   | 26.68   | 25.86   | 23.01   | $\chi^2(3) = 18.97, p < 0.001^a, W = 0.17$           |
| <b>Past month TRQ<sup>e*</sup></b>    |                   |         |                    |         |         |         |         |         |                                                      |
| HTN                                   | 33.45             | 21.13   | 17.31              | 15.63   | 14.39   | 13.15   | 11.27   | 12.03   | $\chi^2(3) = 35.39, p < 0.001^a, W = 0.31$           |
| BD (N= 36)                            | 34.37             | 25.27   | 15.00              | 17.13   | 15.98   | 20.46   | 15.36   | 22.85   | $\chi^2(3) = 26.17, p < 0.001^a, W = 0.23$           |
| <b>eCAP<sup>e*</sup> (HTN) % (SD)</b> |                   |         |                    |         |         |         |         |         |                                                      |
| Past week (N=32)                      | ----              | ----    | 37.70              | 28.19   | 29.83   | 27.33   | 34.75   | 28.88   | $\chi^2(2) = 0.23, p = 0.89$                         |
| Past month (N=32)                     | ----              | ----    | 35.56              | 22.20   | 32.25   | 22.83   | 35.59   | 27.29   | $\chi^2(2) = 0.07, p = 0.97$                         |

<sup>a</sup>sig. difference between SCR & BL, SCR & V1, SCR & V2.

<sup>b</sup>sig. difference between SCR & V2.

<sup>c</sup>sig. difference between SCR & BL, SCR & V1, SCR & V2, BL & V1, BL & V2

<sup>d</sup>sig difference between SCR & V1, SCR & V2

<sup>e</sup>Higher TRQ and eCAP percentage translates to higher non-adherence worse adherence)

\*Friedman test

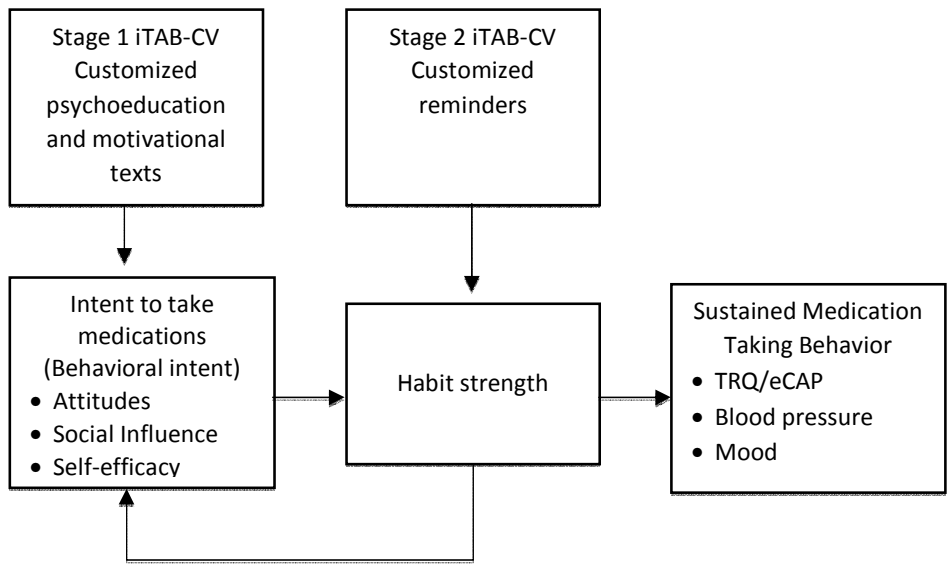

Figure 1: Expanded Attitude-Social Influence-Efficacy Model

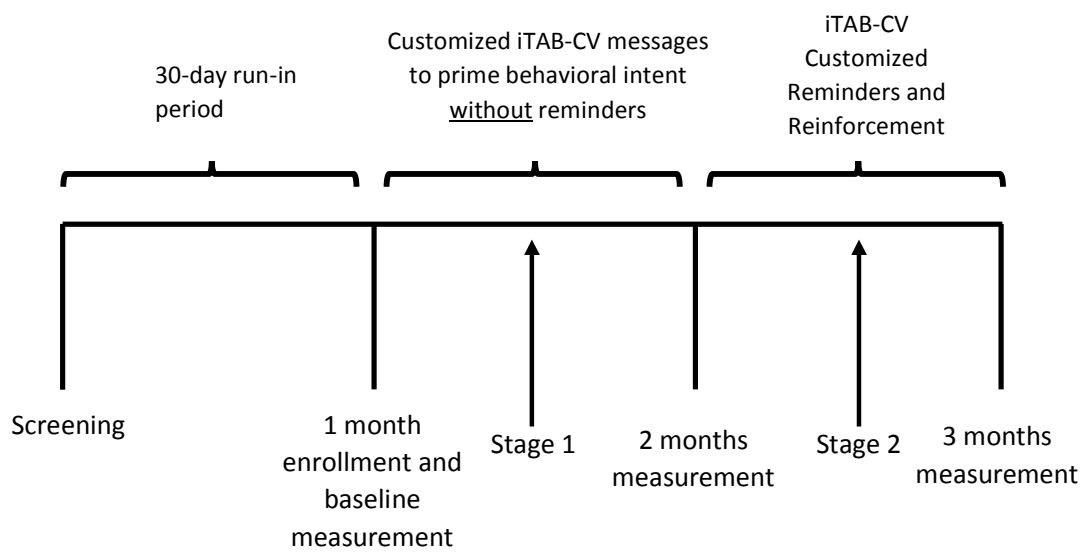

Figure 2: Prospective Cohort Design

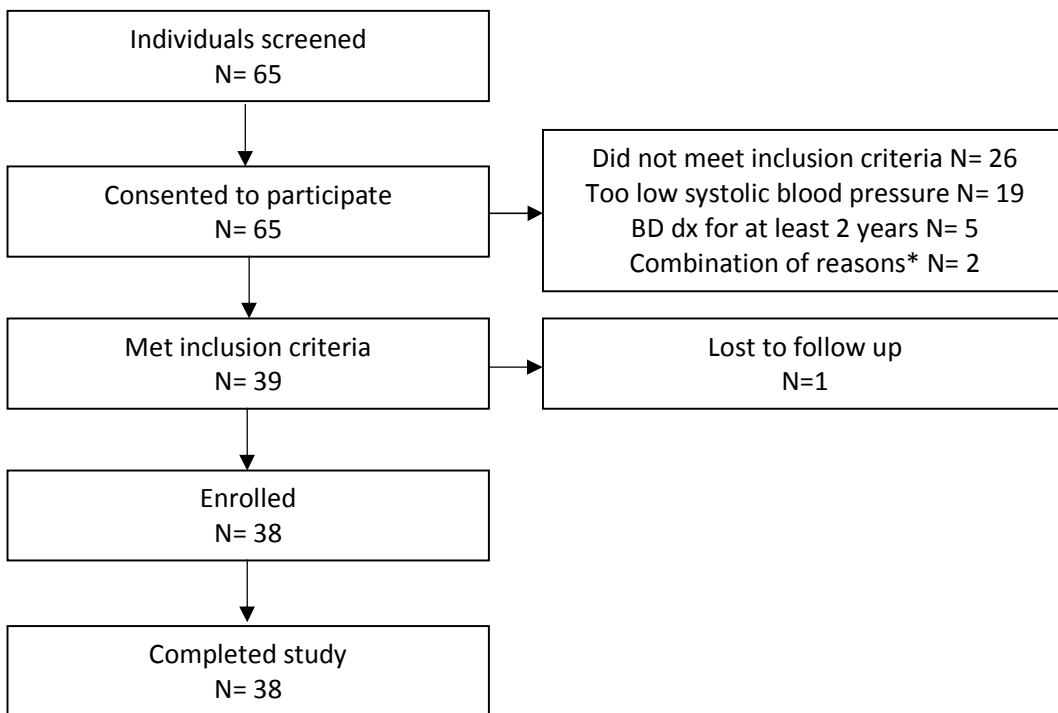

\*One patient failed as they were a high immediate risk of suicide, unwilling to participate in interviews, and possibly schizoaffective instead of having BD.

The other patient failed due to too low systolic blood pressure and not being at least 20% non-adherent to hypertension medications.

Figure 3: Consort Diagram

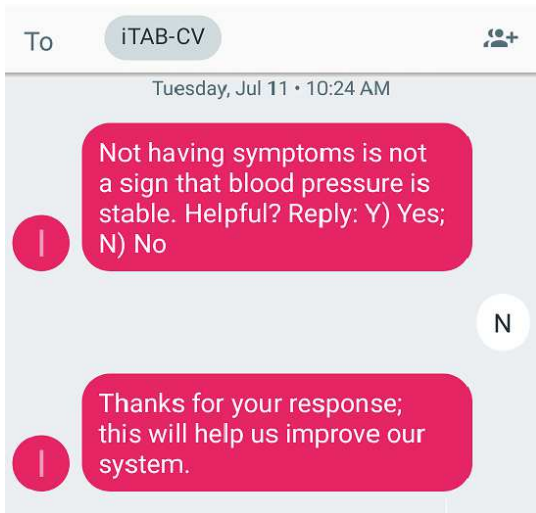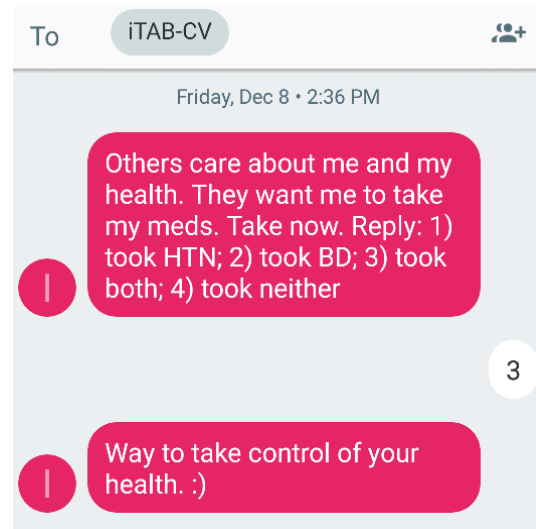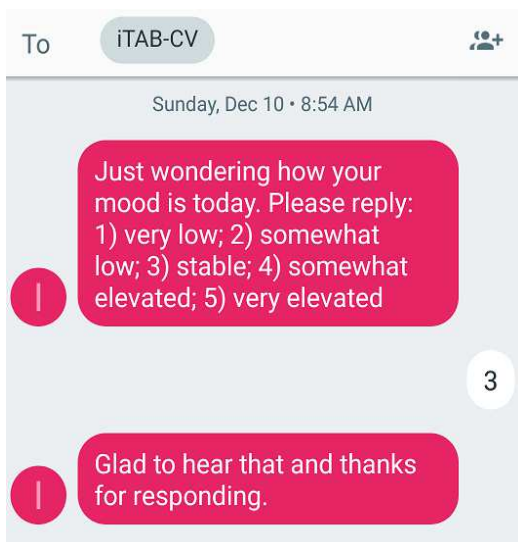

Figure 4: A sample text sequences
